# Supplementary material for: From structural polymorphism to structural metamorphosis of the coat protein of flexuous filamentous potato virus Y
Source: PubMed Central journal article supplement (PMC10794713; doi:10.1038/s42004-024-01100-x), 2024-01-17
Supplement: 42004_2024_1100_MOESM3_ESM.pdf [file 42004_2024_1100_MOESM3_ESM.pdf]

# Description of Additional Supplementary Files

**File name:** Supplementary Data 1

**Description:** Compiled source data for the main and supplemental figures, as described in the main article and supplementary information.
